# Supplementary material for: Electronic excited states of guanine-cytosine hairpins and duplexes studied by fluorescence spectroscopy
Source: Royal Society of Chemistry journal article supplement (doi:10.1039/c3pp50088h), 2013-04-24
Supplement: c3pp50088h.pdf [file c3pp50088h.pdf]

## Electronic Supplementary Information

### Electronic excited states of guanine-cytosine hairpins and duplexes studied by fluorescence spectroscopy

Johanna Brazard,<sup>a</sup> Arun K. Thazhathveetil,<sup>b</sup> Ignacio Vayá,<sup>a</sup> Frederick D. Lewis,<sup>\*b</sup>  
Thomas Gustavsson,<sup>a</sup> Dimitra Markovitsi<sup>\*a</sup>

Table ESI-1. m/z values for oligomer sequences determined by MALDI-TOF mass spectrometry.

| Sequences  | Calculated | Found  | Sequences   | Calculated | Found   |
|------------|------------|--------|-------------|------------|---------|
| <b>d2</b>  | 556.4      | 556.7  | <b>hp2</b>  | 1518.8     | 1519.2  |
| <b>d6</b>  | 1793.2     | 1793.8 | <b>hp6</b>  | 3992.4     | 3998.1  |
| <b>d10</b> | 3030.0     | 3031.2 | <b>hp10</b> | 6465.9     | 6466.8  |
|            |            |        | <b>hp20</b> | 12649.8    | 12644.1 |

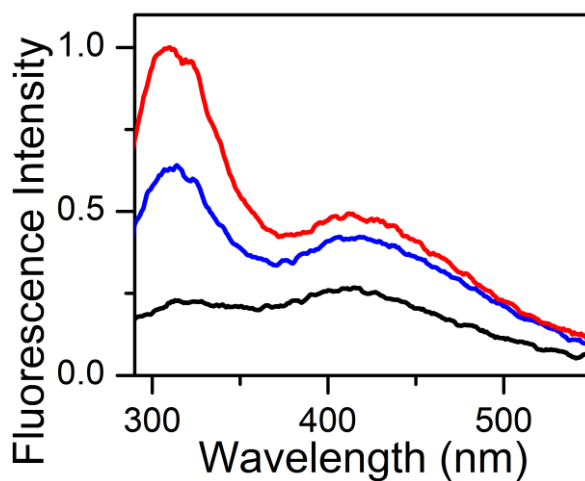

Figure ESI-1. Fluorescence spectra of hp20 before annealing (black), upon one annealing cycle (blue) and two repeated annealing cycles (red);  $\lambda_{\text{ex}} = 255$  nm.

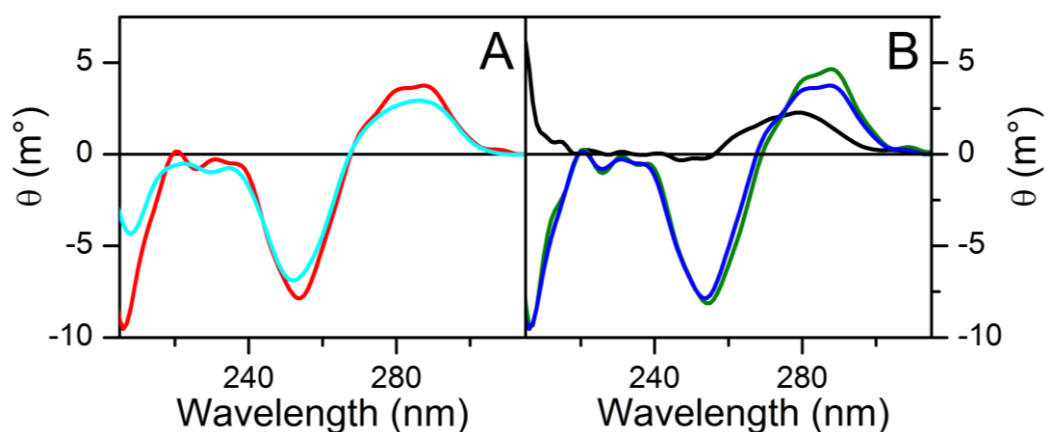

Figure ESI-2. CD spectra of A) hp10 (red) and hp20 (cyan) and B) d2 (black), d6 (green) and d10 (blue).

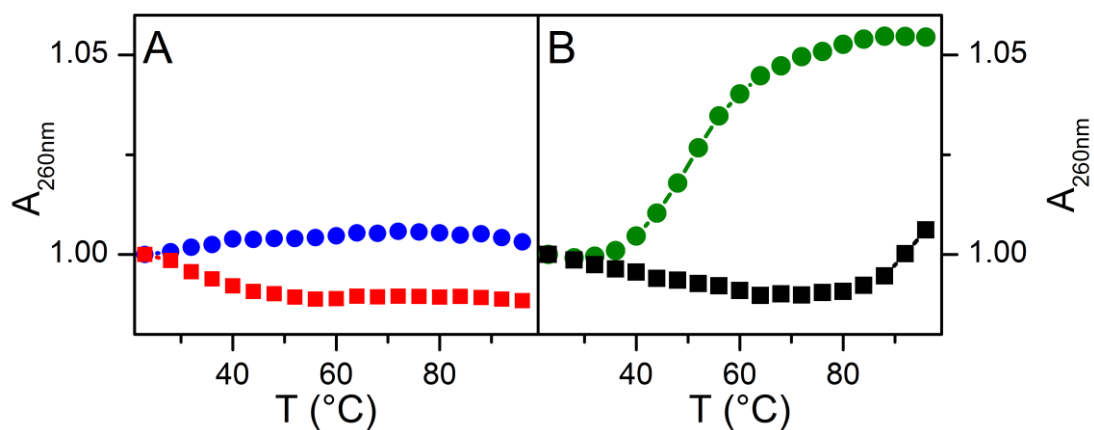

Figure ESI-3. Temperature dependence of the absorbance at 260 nm of A) d2 (blue) and hp2 (red), B) and d6 (green) and hp6 (black).

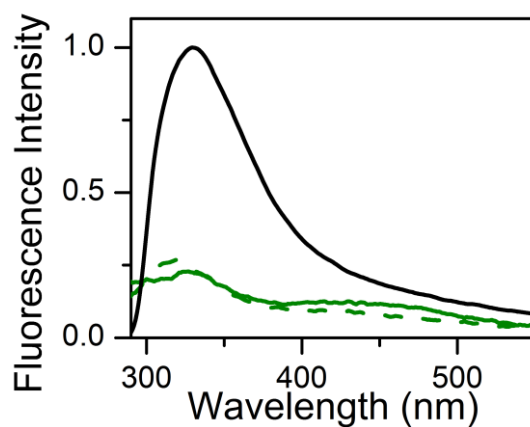

Figure ESI-4. Fluorescence spectra ( $\lambda_{\text{ex}} = 255 \text{ nm}$ ) of hp6 (green, line), d6 (green, dash) and an equimolar mixture of dGMP and dCMP (line, black).
